# Supplementary material for: Differential expression of miR-1, a putative tumor suppressing microRNA, in cancer resistant and cancer susceptible mice
Source: PubMed Central journal article supplement (PMC3642704; doi:10.7717/peerj.68), 2013-04-16

A. 96 hour-post transfection of SC in A5 Cells

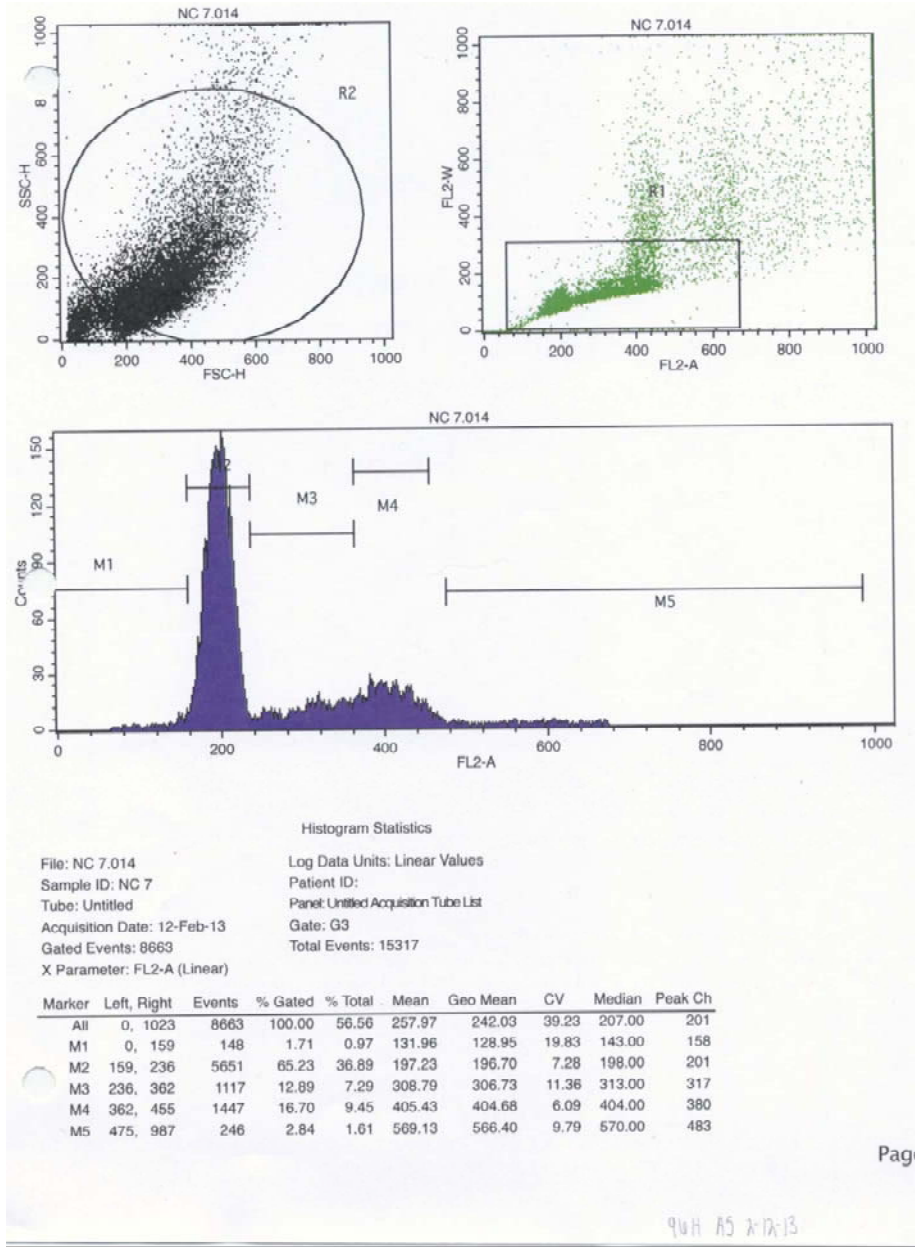

B. 96 hour-post transfection of *miR-1* in A5 Cells

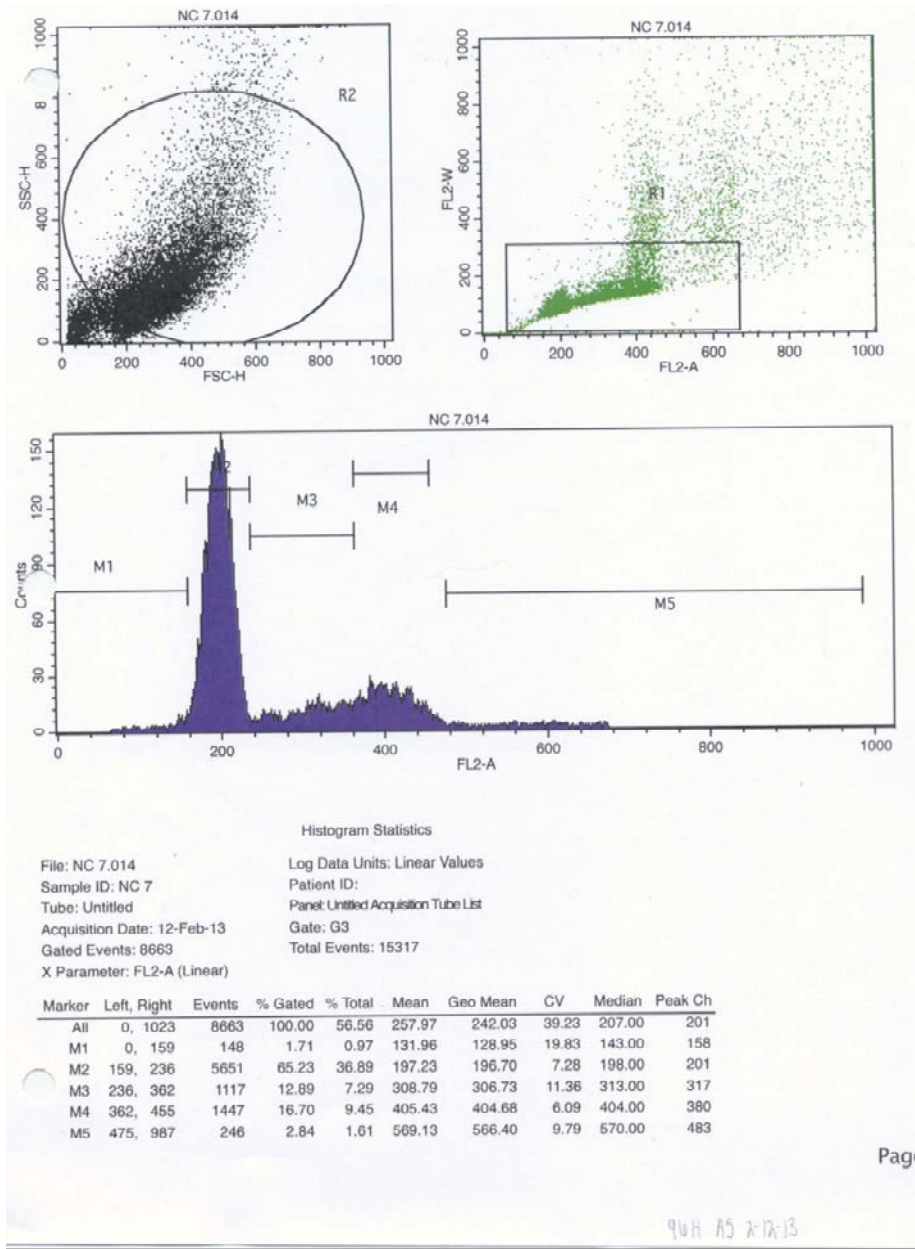

C. 96 hour-post transfection of SC in B9 Cells

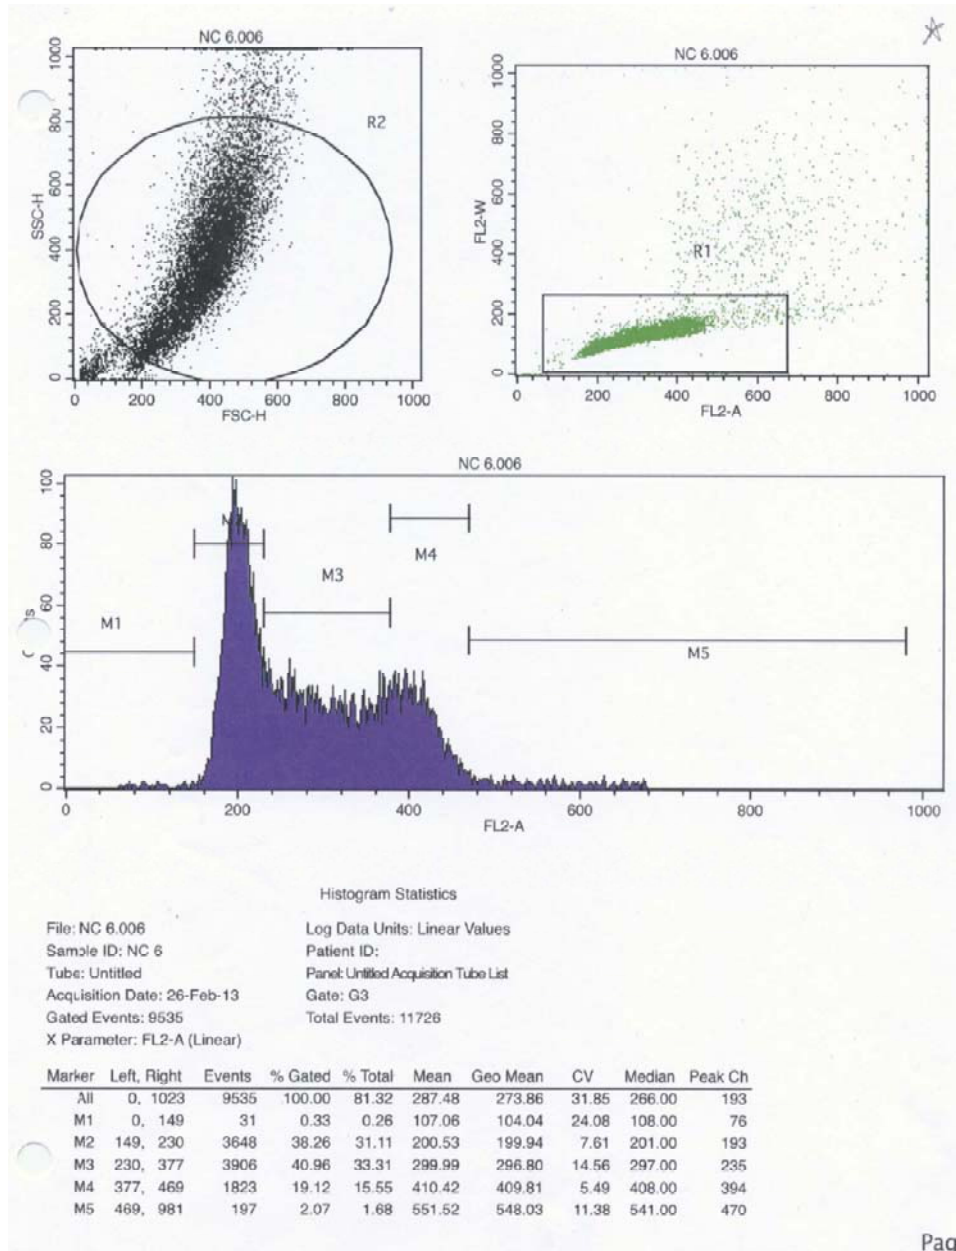

D. 96 hour post-transfection of *miR-1* in B9 cells

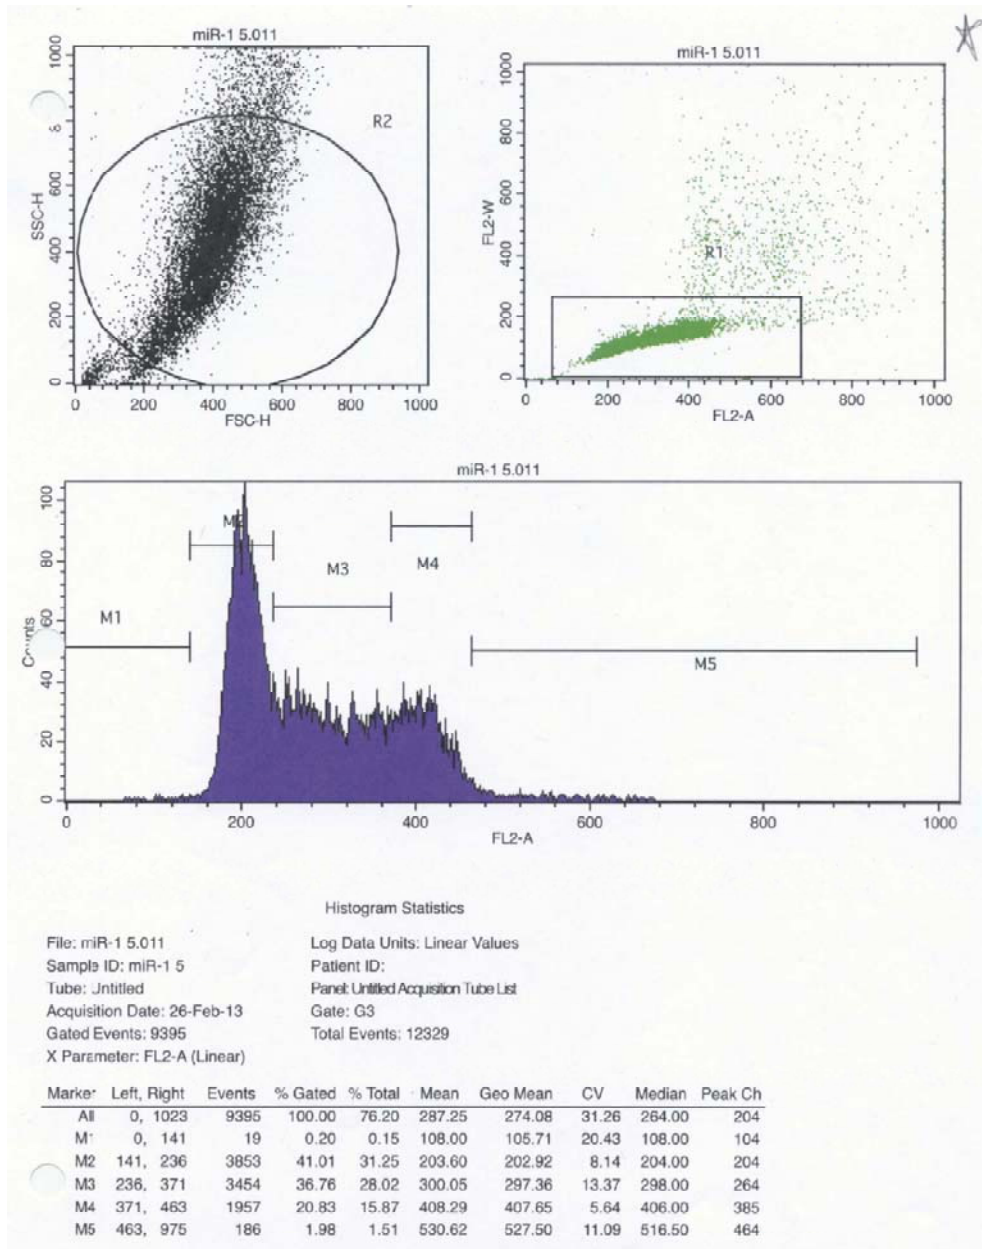

Supplement: peerj-01-68-s004.pdf [file peerj-01-68-s004.pdf]
