# Supplementary material for: Differential expression of miR-1, a putative tumor suppressing microRNA, in cancer resistant and cancer susceptible mice
Source: PeerJ. 2013 Apr 16;1:e68. doi: 10.7717/peerj.68 (PMC3642704; doi:10.7717/peerj.68)
Supplement: Table S2 — Genes predicted to be targets of the validated five miRNAs. [file peerj-01-68-s007.docx]

| **miR-1 Predicted Targets** |
| --- |
| 1110003E01Rik | Slc7a6 |
| Ankrd13c | Smarcd1 |
| Arcn1 | Sri |
| Bag4 | Ss18 |
| Bcl2 | Syt1 |
| Bdnf | Tbc1d15 |
| Cap1 | Timp3 |
| Cdk14 | Trim2 |
| Cltc | Twf1 |
| Cmpk2 | Ust |
| Col4a3 | Zfp148 |
| Coro1c | Zfp280d |
| Dll1 | Zfp36L1 |
| Edn1 | Zfp36L2 |
| Eif4e |
| Entpd7 |
| Erc1 |
| Ets1 |
| Faf2 |
| Foxp1 |
| G6pdx |
| Gja1 |
| Hand2 |
| Hdac4 |
| Hsp90b1 |
| Kdsr |
| Klf13 |
| Lasp1 |
| Mapk1 |
| Mapk3 |
| Mef2c |
| Met |
| Mmd |
| Mtap1a |
| Pdik1l |
| Pik3c2a |
| Pim1 |
| Plxna4 |
| Prkce |
| Ptpn14 |
| Rfesd |
| Rrbp1 |
| Rufy2 |
| Serp1 |
| Slc39a10 |
| **miR-124 Predicted Targets** |
| 4933426M11Rik | Sox2 | |
| Abcc1 | Sox9 | |
| Apln | Trib3 | |
| B4galt1 | Ttl | |
| Bmp6 | Vamp3 | |
| Cd164 | Vim | |
| Cdk6 | Xpo4 | |
| Cebpa |
| Chic1 |
| Ctns |
| Ddx3x |
| Efnb1 |
| Eya4 |
| Ezh2 |
| Flot2 |
| Gga2 |
| Hes1 |
| Igfbp7 |
| Itgb1 |
| Itpr3 |
| Klhl24 |
| Lcp1 |
| Lhx2 |
| Limk1 |
| Lpp |
| Lrrc58 |
| Magt1 |
| Mecom |
| Nfatc1 |
| Nipa1 |
| Pabpc4L |
| Pik3c2a |
| Plxna3 |
| Prrx1 |
| Prtg |
| Ptbp2 |
| Ptpn12 |
| Ptprj |
| Rhog |
| Rnpepl1 |
| Rock2 |
| Rod1 |
| Sept10 |
| Slc16a1 |
| Slitrk6 |
| | **mir-133a Predicted Targets** | | --- | | Btbd3 | | Capn5 | | Casp9 | | Ctgf | | Fscn1 | | Gnrhr | | Hspa4 | | Hspd1 | | Klf15 | | Krt7 | | Krt8 | | Lasp1 | | Myh9 | | Ppp3cb | | Slc24a4 | | Smarcd1 | | Srf | | Tpm4 | | Twf1 | | **miR-134 Predicted Targets** | | Abcc1 | | Bard1 | | Cdk6 | | Creb1 | | Foxa2 | | Ghr | | Gm608 | | Grik3 | | Lhx2 | | Limk1 | | Mtpn | | Nr5a2 | | Ppt1 | | Ptpn2 | | Rab27a | | Sox2 | |
|  |
|  |
|  |
|  |
|  |
|  |
| **miR-192 Predicted Targets** |
| Arhgap19 |
| Cdc7 |
| Cxcl2 |
| Dhfr |
| Ercc3 |
| Ercc4 |
| Gmeb1 |
| Mdm2 |
| Pabpc4 |
| Per1 |
| Per2 |
| Per3 |
| Ptprt |
| Rb1 |
| Rsad2 |
| Sip1 |
| Slc5a3 |
| Tgfb1 |
| Wnk1 |
| Xiap |
| Zeb1  Zeb2 |

| | **miR-206 Predicted Targets** | | --- | | Adar | | Aftph | | Bach2 | | Bdnf | | Bsn | | Cap1 | | Celf4 | | Cmpk1 | | Coro1c | | Cplx2 | | Edem1 | | Eif4E | | Esr1 | | Ets1 | | Fgfbp1 | | Foxp1 | | Fstl1 | | Gabpb2 | | Gja1 | | Hdac4 | | Hsp90B1 | | Lass4 | | Lhfp | | Met | | Mmd | | Nfat5 | | Notch3 | | Pax3 | | Pola1 | | Ptplad1 | | Ptprj | | Ptprk | | Ptprz1 | | Rb1cc1 | | Sgms2 | | Slc44a1 | | Smarcd1 | | Tnks2 | | Tspyl4 | | Unc119B | | Utrn | | Vamp2 | | Zxdb | |
| --- | --- | --- | --- | --- | --- | --- | --- | --- | --- | --- | --- | --- | --- | --- | --- | --- | --- | --- | --- | --- | --- | --- | --- | --- | --- | --- | --- | --- | --- | --- | --- | --- | --- | --- | --- | --- | --- | --- | --- | --- | --- | --- | --- | --- |
